# Supplementary figures and images for: Epigenetic modification of the oxytocin receptor gene is associated with emotion processing in the infant brain
Source: PubMed Central journal article supplement — Dev Cogn Neurosci. 2019 Apr 26;37:100648. doi: 10.1016/j.dcn.2019.100648 (PMC6969294; doi:10.1016/j.dcn.2019.100648), 2019-04-26

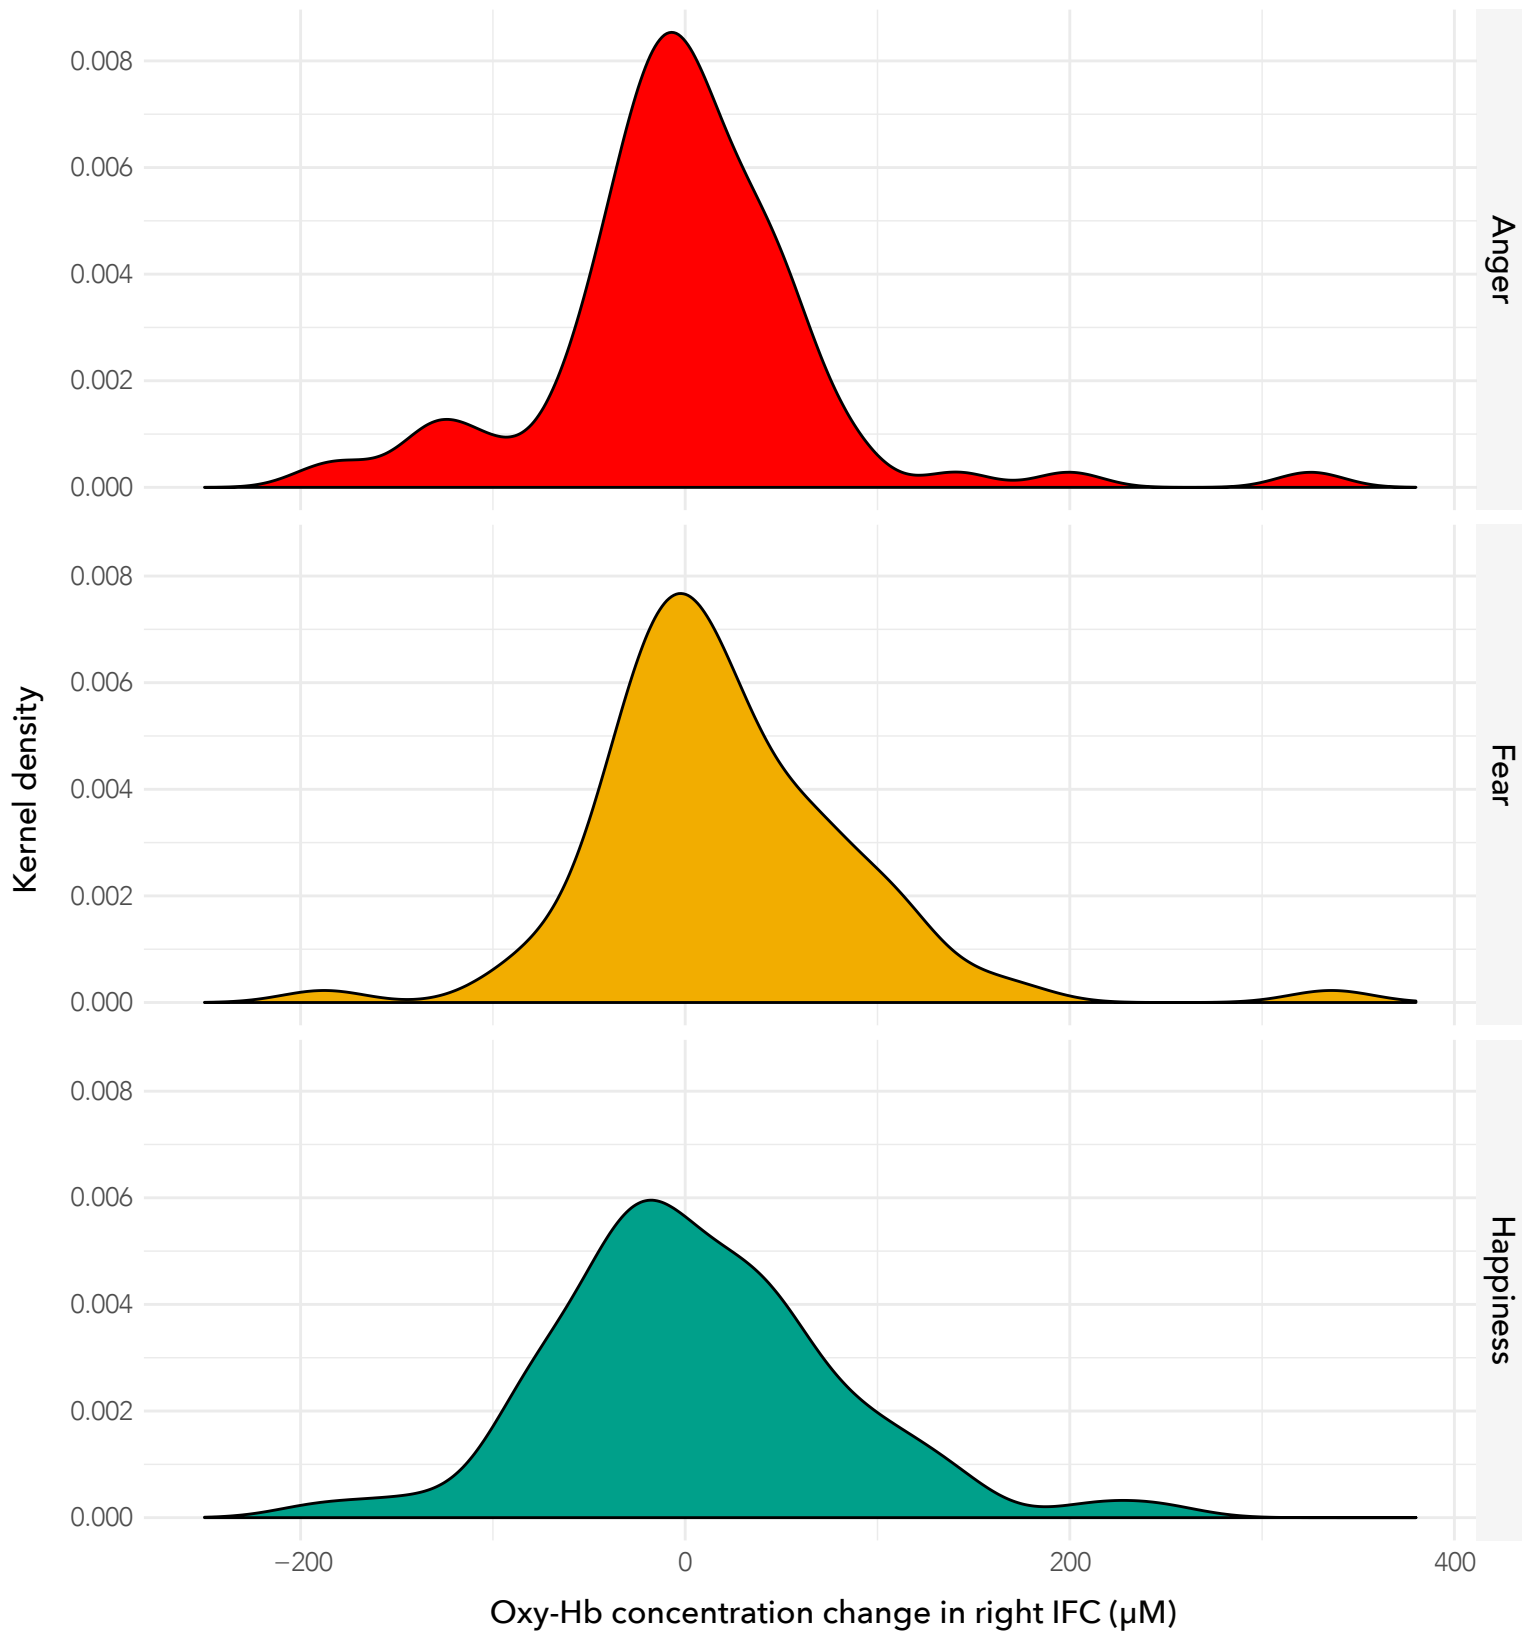

Supplement: mmc2.pdf [file mmc2.pdf]
